# Supplementary material for: Biogeochemical structure of the Laptev Sea in 2015-2020 associated with the River Lena plume
Source: Frontiers journal article supplement (doi:10.3389/fmars.2023.1180054), 2023-05-30
Supplement: Table_1.docx [file Table_1.docx]

# Supplementary

TABLE S1 KMO and Bartlett’s Test.

| Kaiser-Meyer-Olkin Measure of Sampling Adequacy | | | | | 0.619 |
| --- | --- | --- | --- | --- | --- |
| Bartlett's Test of Sphericity | | |  | Approx. Chi-Square | 5035.95 |
|  |  |  |  | df | 55 |
|  |  |  |  | Sig. | 0.000 |

| Principal  components | Initial Eigenvalues | | | Extraction Sums of Squared Loadings | | |
| --- | --- | --- | --- | --- | --- | --- |
| Total | % of Variance | Cumulative% | Total | % of Variance | Cumulative% |
| 1 | 4.576 | 41.602 | 41.602 | 4.576 | 41.602 | 41.602 |
| 2 | 2.156 | 19.598 | 61.200 | 2.156 | 19.598 | 61.200 |
| 3 | 1.450 | 13.180 | 74.381 | 1.450 | 13.180 | 74.381 |
| 4 | 0.858 | 7.802 | 82.183 |  |  |  |
| 5 | 0.607 | 5.522 | 87.705 |  |  |  |
| 6 | 0.43 | 3.911 | 91.616 |  |  |  |
| 7 | 0.358 | 3.252 | 94.867 |  |  |  |
| 8 | 0.254 | 2.311 | 97.178 |  |  |  |
| 9 | 0.229 | 2.084 | 99.262 |  |  |  |
| 10 | 0.077 | 0.698 | 99.959 |  |  |  |
| 11 | 0.004 | 0.041 | 100.000 |  |  |  |

TABLE S2 Total variance explained.
